# IDH1 and IDH2 mutants identified in cancer lose inhibition by isocitrate because of a change in their binding sites

Juan P Bascur<sup>1</sup>, Melissa Alegría-Arcos<sup>1,2,3</sup>, Ingrid Araya-Durán<sup>1,2</sup>, Ezequiel I Juritz<sup>1</sup>, Fernando D González-Nilo<sup>1,3</sup>, Daniel E Almonacid<sup>Corresp. 1,2,3</sup>

<sup>1</sup> Center for Bioinformatics and Integrative Biology, Facultad de Ciencias Biológicas, Universidad Andrés Bello, Santiago, Chile

<sup>2</sup> uBiome, Inc., San Francisco, California, United States

<sup>3</sup> Centro Interdisciplinario de Neurociencia de Valparaíso, Facultad de Ciencias, Universidad de Valparaíso, Valparaíso, Chile

Corresponding Author: Daniel E Almonacid

Email address: [daniel.almonacid@unab.cl](mailto:daniel.almonacid@unab.cl)

IDH1 and IDH2 are human enzymes that convert isocitrate (ICT) into  $\alpha$ -ketoglutarate (AKG). However, mutations in positions R132 of IDH1 and R140 and R172 of IDH2 cause these enzymes to convert AKG into 2-hydroxyglutarate (2HG). Concurrently, accumulation of 2HG in the cell is correlated with the development of cancer. This activity change is mainly due to the loss of the competitive inhibition by ICT of these enzymes, but the molecular mechanism behind this loss of inhibition is currently unknown. In this work we characterized the inhibition and loss of inhibition of IDH1 and IDH2 by means of the binding energies derived from molecular docking calculations. We characterized the substrate binding sites and how they differ among the mutant and wild type enzymes using a Jaccard similarity coefficient based on the residues involved in binding the substrates. We found that molecular docking effectively identifies the inhibition by ICT in the wild type and mutant enzymes that do not appear in tumors, and the loss of inhibition in the mutant enzymes that appear in tumors. Additionally, we found that the binding sites of the mutant enzymes are different among themselves. Finally, we found that the regulatory segment of IDH1 plays a prominent role in the change of binding sites between the mutant enzymes and the wild-type enzymes. Our findings show that the loss of inhibition is related to variations in the enzyme binding sites. Additionally, our findings show that a drug capable of targeting all IDH1 and IDH2 mutations in cancer is unlikely to be found due to significant differences among the binding sites of these paralogs. Moreover, the methodology developed here, which combines molecular docking calculations with binding site similarity estimation, can be useful for engineering enzymes, for instance, when aiming to modify their substrate affinity.

1 **IDH1 and IDH2 mutants identified in cancer lose inhibition by isocitrate because of a**  
2 **change in their binding sites**

3 Juan P. Bascur<sup>1</sup>, Melissa Alegría-Arcos<sup>1,2,3</sup>, Ingrid Araya-Durán<sup>1,2</sup>, Ezequiel I. Juritz<sup>1</sup>, Fernando  
4 D. González-Nilo<sup>1,3</sup>, Daniel E. Almonacid<sup>1,2,3</sup>

5 <sup>1</sup>Center for Bioinformatics and Integrative Biology, Facultad de Ciencias Biológicas,

6 Universidad Andres Bello, Santiago, Chile

7 <sup>2</sup>uBiome, Inc., San Francisco, California, United States

8 <sup>3</sup>Centro Interdisciplinario de Neurociencia de Valparaíso, Facultad de Ciencias, Universidad de  
9 Valparaíso, Valparaíso, Chile

10

11 Corresponding author:

12 Daniel Almonacid<sup>1,2,3</sup>

13

14 **Email address: [daniel.almonacid@unab.cl](mailto:daniel.almonacid@unab.cl)**

## 15 Abstract

16 IDH1 and IDH2 are human enzymes that convert isocitrate (ICT) into  $\alpha$ -ketoglutarate (AKG).  
17 However, mutations in positions R132 of IDH1 and R140 and R172 of IDH2 cause these enzymes  
18 to convert AKG into 2-hydroxyglutarate (2HG). Concurrently, accumulation of 2HG in the cell is  
19 correlated with the development of cancer. This activity change is mainly due to the loss of the  
20 competitive inhibition by ICT of these enzymes, but the molecular mechanism behind this loss of  
21 inhibition is currently unknown. In this work we characterized the inhibition and loss of inhibition  
22 of IDH1 and IDH2 by means of the binding energies derived from molecular docking calculations.  
23 We characterized the substrate binding sites and how they differ among the mutant and wild type  
24 enzymes using a Jaccard similarity coefficient based on the residues involved in binding the  
25 substrates. We found that molecular docking effectively identifies the inhibition by ICT in the wild  
26 type and mutant enzymes that do not appear in tumors, and the loss of inhibition in the mutant  
27 enzymes that appear in tumors. Additionally, we found that the binding sites of the mutant enzymes  
28 are different among themselves. Finally, we found that the regulatory segment of IDH1 plays a  
29 prominent role in the change of binding sites between the mutant enzymes and the wild-type  
30 enzymes. Our findings show that the loss of inhibition is related to variations in the enzyme binding  
31 sites. Additionally, our findings show that a drug capable of targeting all IDH1 and IDH2  
32 mutations in cancer is unlikely to be found due to significant differences among the binding sites  
33 of these paralogs. Moreover, the methodology developed here, which combines molecular docking  
34 calculations with binding site similarity estimation, can be useful for engineering enzymes, for  
35 instance, when aiming to modify the substrate affinity of an enzyme.

## 36 Introduction

37 Human enzymes isocitrate dehydrogenase 1 (IDH1) and isocitrate dehydrogenase 2 (IDH2) are  
38 members of the NADP<sup>+</sup> dependent isocitrate dehydrogenase family of enzymes. IDH1 is found  
39 in the cytoplasm, while IDH2 is found in the mitochondria. Both enzymes convert isocitrate  
40 (ICT) and NADP<sup>+</sup> into  $\alpha$ -ketoglutarate (AKG), CO<sub>2</sub> and NADPH, refilling the cell  
41 NADPH reserves. IDH1 also catalyzes the reverse reaction during hypoxic conditions, refilling  
42 the ICT reserves. The active form of these enzymes is a homodimer presenting 2 active sites in  
43 the interface between the subunits. These enzymes present an open form when binding just  
44 NADP<sup>+</sup> or NADPH, adopting the closed form upon binding ICT or AKG. It is well established  
45 that mutations in positions IDH1 R132, IDH2 R140 and IDH2 R172 are associated with cancer  
46 development, particularly in glioblastomas, lymphomas and leukemias (Yan et al., 2009;  
47 Marcucci et al., 2010; Cairns et al., 2012). These mutations confer the enzymes the activity of  
48 converting AKG and NADPH into 2-hydroxyglutarate (2HG) and NADP<sup>+</sup>, impeding their  
49 normal activity (Dang et al., 2009). Furthermore, accumulation of 2HG in the cell is strongly  
50 correlated with the development of cancer (Dang et al., 2009; Losman & Kaelin, 2013).

51 In a healthy cell the conversion of AKG into ICT is inhibited in presence of ICT, as ICT and  
52 AKG compete for the same active site. When the concentration of ICT decreases, as during  
53 hypoxia, conversion of AKG into ICT is uninhibited (Wise et al., 2011; Filipp et al., 2012).  
54 Mutant enzymes, however, are not inhibited in presence of ICT (Pietrak et al., 2011). It is  
55 believed that this lack of inhibition allows these enzymes to accept AKG as a substrate (Pietrak

56 et al., 2011). The mechanism by which the mutant enzymes convert AKG into 2HG, instead of  
57 ICT is still being investigated. It has been hypothesized that it could result from the  
58 conformational changes of the residues surrounding the active site; or even changes in the kinetic  
59 mechanism of the mutant enzymes (Dang et al., 2009; Rendina et al., 2013). However, the  
60 mechanism by which the mutant enzymes lose their inhibition has not been investigated.

61 In this work, we present a detailed characterization of this inhibition loss mechanism through  
62 molecular docking simulations. We worked for that end with the structures of both mutant and  
63 wild type IDH1 and IDH2 enzymes and analyzed the binding energies and substrate binding  
64 sites. A novel methodology introduced in this study is the comparison of binding sites by  
65 computing a Jaccard similarity coefficient (Jaccard, 1912) based on the residues involved in  
66 substrate binding. We found that the binding energies were coherent with the observed loss of  
67 inhibition in the mutant enzymes. We also found that the binding sites present significant  
68 differences among the mutants and, in addition, evidence that some of these binding sites are  
69 functional.

## 70 **Materials and methods**

### 71 **Sequence information**

72 The nucleotide and amino acid sequences as well as SNP information for human IDH1 and  
73 IDH2, porcine IDH2 and *Escherichia coli*'s isocitrate dehydrogenase (IDH) were retrieved from  
74 the NCBI databases (NCBI Resource Coordinators, 2016) (Table 1). Mutations reported in  
75 tumours were obtained from the "Catalog of somatic mutations in cancer" (COSMIC) version 80  
76 (Forbes et al., 2015). Only substitutions with both wild type and mutant nucleotides explicitly  
77 reported were included.

78 The catalytic residues of IDH1 and IDH2 were mapped from the *E. coli* IDH sequence by  
79 alignments performed by PROMALS3D (Pei, Kim & Grishin, 2008). The *E. coli* isocitrate  
80 dehydrogenase (IDH) catalytic residues were obtained from the entry M0007 of the Mechanism,  
81 Annotation and Classification in Enzymes (MACiE) database (Holliday et al., 2012). The  
82 regulatory segment, clefts flanking residues and the protein domains of human IDH2 and porcine  
83 IDH2 were mapped from human IDH1 by sequence alignment with PROMALS3D.

### 84 **Protein structures selection**

85 We used the wild type enzymes as well as mutations reported in tumors for positions IDH1  
86 R100, IDH1 R132, IDH2 R140 and IDH2 R172 in the COSMIC database to establish which  
87 mutant structures to use. The most common mutation for each site was selected and thus the  
88 structures of IDH1 R100Q, IDH1 R132H, IDH2 R140Q and IDH2 R172K were used.

89 The protein structures were either obtained from the Protein Data Bank (PDB) (Berman et al.,

90 2000), from homology modeling using Modeller 9.17 (Šali & Blundell, 1993) combined with the  
91 Maestro Prime tool (Jacobson et al., 2004) or from modeled mutations using the Maestro Suite  
92 Platform (Schrödinger, 2015) and Maestro Prime tool (Table 2).

93 IDH1 WT form is open when bound to NADP<sup>+</sup> (Xu et al., 2004) and closed when it binds NADP  
94 <sup>+</sup> and ICT (Xu et al., 2004). On the other hand, the form of IDH1 R132H is open when  
95 binding NADP<sup>+</sup> (Yang et al., 2010), intermediate when it binds NADP<sup>+</sup> and ICT (Yang et al.,  
96 2010) and closed when is bound to NADPH and AKG (Rendina et al., 2013). A similar behavior  
97 is reported for IDH2 (Lv et al., 2012). The conformation from the forms of all studied structures  
98 were obtained from their original publications. Once the form was identified, it was annotated as  
99 either open form (OF), intermediate form (IF) or closed form (CF). Structures without identified  
100 form in their original publications also did not have ICT or AKG bound, so they were annotated  
101 as without substrate (WS) to highlight this common feature. IDH1 WT OF (PDB ID: 1T09) and  
102 the modeled structure IDH2 WT OF did not have substrates bound, but they were annotated as  
103 OF because the form of IDH1 WT OF is explicitly stated in its original publication. The form of  
104 the modeled structures was annotated according to their template.

#### 105 Closed form structures

106 Human IDH1 WT CF structure was downloaded from the PDB database (PDB ID: 1T0L).  
107 Porcine IDH2 CF (PDB ID: 1LWD) was used as a substitute for human IDH2 WT CF, as there  
108 are no structures for the latter deposited in the PDB database. IDH2 WT CF was not modeled as  
109 it was not required for the molecular docking simulations. The only closed form of the mutant  
110 enzymes found in the PDB was IDH1 R132H CF (PDB ID: 4KZO), and it was defined as the  
111 representative structure for all closed forms of the mutant enzymes.

#### 112 Intermediate form structures

113 The only intermediate form available in the PDB database was IDH1 R132H IF (PDB ID:  
114 3MAP) and, therefore, it was defined as the representative structure for all intermediate forms.

#### 115 Open form structures

116 IDH1 WT OF was available in the PDB database (PDB ID: 1T09). IDH2 WT OF was not in the  
117 PDB, so it was modeled based on the sequence of IDH2 WT and the structure of IDH1 WT OF  
118 due to the high amino acid identity between IDH1 and IDH2 (>70%). The model was generated  
119 using Modeller, and the model quality was estimated using the DOPE score of Modeller. The  
120 NADP<sup>+</sup> cofactor was added to the model by structural superposition with the template. The  
121 protein-cofactor complex structure was minimized using the Prime tool of Maestro in order to  
122 keep the reported interactions. The mutant open form structures were not modeled, as they were  
123 expected to be among the set of structures without substrate.

## 124 Structures without substrate

125 In the IDH1 R132H WS structure obtained from the PDB (PDB ID: 3MAR) some of the  
126 unresolved residues were considered relevant for the protein-ligand molecular docking due to  
127 their possible proximity to the binding site. An additional structure of IDH1 R132H WS with all  
128 its residues was modeled over the structure of IDH1 R132H WS and defined as IDH1 R132H  
129 Modeled (Mod.) WS. The protocol followed for modeling was the same as for IDH2 WT OF  
130 model. Because IDH1 R100Q WS was not available in PDB database, it was modeled by  
131 introducing mutations into the structure of IDH1 R132H WS. The structure was mutated (R100Q  
132 and H132R) with the Maestro Suite Platform on all chains and the mutated residues were  
133 minimized using the Prime tool of Maestro. IDH2 R140Q WS (PDB ID: 5SVO) and IDH2  
134 R172K WS (PDB ID: 5SVN) were available in the PDB database.

135 We aimed to perform a comparison between the binding sites of the open, intermediate and  
136 closed structures among the WT and mutant IDH1 and IDH2 enzymes. The secondary structure  
137 of the regulatory segments was annotated using the Maestro Suite Platform (Table 3).

## 138 Structural characterization of the complexes

139 In the IDH1 structure the active site is located in a cleft (active site cleft) and behind another  
140 well-defined cleft (back cleft). In the open form the active site cleft is wider than the back cleft,  
141 while in the closed form the back cleft is wider. Moreover, in the open form the active site cleft  
142 of one subunit is wider than the cleft of the other subunit, and are accordingly defined as open  
143 cleft (OC) and semi-open cleft (SC) (Figure 1) (Xu et al., 2004). The open and semi-open clefts  
144 of the open form structures were identified by measuring the width of the active site cleft and the  
145 back cleft of each subunit. This step was essential to identify the OC and the SC of each  
146 structure, so the binding site and binding energies for the complexes were compared among  
147 clefts of the same kind. The residues flanking the clefts in IDH1 were obtained from the  
148 literature (Xu et al., 2004) and the residues in IDH2 and porcine IDH2 were inferred by sequence  
149 alignment with IDH1 (Table 4). The back cleft is flanked by residues of the same subunit,  
150 whereas the active site cleft is flanked by residues on opposite subunits, so we emphasized  
151 whether the flanking residues belonged to the same chain (S. Ch.) or the opposite chain (O. Ch.).  
152 The width was measured as the distance between the  $\alpha$ -carbons of the flanking residues.

153 Root Mean Square Deviation (RMSD) between both subunits of each structure was also  
154 calculated in order to classify the structures as symmetric or asymmetric. These measurements  
155 were used for later analyses of the binding sites. RMSD values were calculated based on the  $\alpha$ -  
156 carbons of the structures using Protein3Dfit (Lessel & Schomburg, 1994).

## 157 Molecular docking

158 A validation was necessary to prove the fitness of the molecular docking algorithms used for the  
159 enzyme-substrate complex system under study. The method for validating consisted of removing  
160 co-crystallized molecules from protein complex structures and then re-docking them on their  
161 original site, testing if the docked molecule position was equivalent to the original molecule

162 position (Warren et al., 2006). The molecular docking algorithms Autodock Vina (Morris et al.,  
163 2009) and Glide XP (Schrödinger, 2015) were validated by redocking ICT on IDH1 WT CF and  
164 AKG on IDH1 R132H CF (data not shown). Glide XP outperformed Autodock Vina and  
165 therefore was selected for the molecular docking simulations reported in this work.

166 Receptor files for the molecular docking simulations were prepared with the “Protein Preparation  
167 Wizard” of the Maestro Suite Platform. All substrate structures were obtained from PubChem  
168 (Kim et al., 2016). PubChem CID code for ICT is 1198 and for AKG is 51. Ligand files were  
169 prepared using the “Ligand Preparation Wizard” of the Maestro Suite Platform. The size of the  
170 grid was established at 40Åx40Åx40Å and it was centered on the centromere of the binding  
171 residues in the closed form of the enzymes, calculated independently for each grid (Table 5). For  
172 all structures, binding residues were defined as the residues within 4Å from the substrates, and  
173 the centromere was calculated using the  $\alpha$ -carbons of the binding residues. The closed structure  
174 forms used to obtain the binding residues in closed formation were IDH1 WT CF and IDH1  
175 R132H CF. The binding residues were identified in all chains of both structures and included in  
176 the residue set used for defining the centromere location. Interestingly, both closed structures had  
177 the same binding residues. The binding residues of IDH2 were mapped from IDH1 by sequence  
178 alignment.

## 179 **Molecular docking comparisons**

180 We used the docking score of Glide XP as the binding energies of the docking simulations. The  
181 differences registered among the binding energies of both ICT and AKG and the receptors in the  
182 molecular dockings were obtained in order to confirm that the mutant enzymes were, in effect,  
183 uninhibited when compared to the wild type enzymes (hereafter  $\Delta\Delta G$ ). The mutant  $\Delta\Delta G$  value  
184 was then compared with the registered difference in the wild type enzymes (hereafter  $\Delta\Delta\Delta G$ ).  
185 The lowest registered  $\Delta\Delta G$  value of the WT enzymes for each cleft ( $L\Delta\Delta G$ ) was used in the  
186 comparisons to increase the stringency of our analyses.

187 The binding sites of the molecular docking assays were defined as the residues within a 4Å  
188 distance from the substrates. The similarity between the binding sites was measured using the  
189 Jaccard Similarity Coefficient (JS) (Jaccard, 1912) as shown in Eq. 1. The similarity between the  
190 binding sites of the substrates was computed considering the similarity between the binding sites  
191 of both substrates (Both S.) ICT and AKG together, or each substrate individually. The structure  
192 of IDH1 R132H CF was ignored as it presents the same binding residues as IDH1 WT CF.

$$193 \quad (1) \quad JS = \frac{N^{\circ} \text{ of shared residues between the sites}}{N^{\circ} \text{ of residues of site A} + N^{\circ} \text{ of residues of site B} - N^{\circ} \text{ of shared residues between the sites}}$$

## 194 **Results**

### 195 **Reported mutations for IDH1 and IDH2**

196 Substitutions reported in tumours for positions IDH1 R100, IDH1 R132, IDH2 R140 and IDH2  
197 R172 were considered for identifying the most common mutation per position (Table 6). A total

198 of 10, 783, 5604 and 412 substitutions were found for each position respectively. The most  
199 common mutations were IDH1 R100Q, IDH1 R132H, IDH2 R140Q and IDH2 R172K. No  
200 proline substitutions were reported. It has been suggested that proline substitutions are unrelated  
201 to cancer due to their significant disruptive effect on protein structures (Pietrak et al., 2011).

## 202 **Clefts widths and symmetry of the structures**

203 IDH1 and IDH2 are dimers with 2 active sites that are asymmetric in open form (inactive) and  
204 symmetric in closed form (active). The active site is inside a cleft (active site cleft) and behind a  
205 second cleft (back cleft). The asymmetry of the active sites is mainly due to the fact that one  
206 active site cleft is wider than the other (the open cleft and the semi-open cleft). In the open form,  
207 the active site opens and the back cleft closes, and the opposite happens when the protein adopts  
208 the closed form (Figure 1) (Xu et al., 2004).

209 We measured the cleft widths to determine if the enzyme form is closed or open (Table 7). We  
210 also identified in each structure the corresponding cleft (open or semi-open) for each active site  
211 cleft (the wider cleft was the open cleft). We used the values of IDH1 WT OF and IDH1 WT CF  
212 as references to determine if a structure is in open or closed form. Additionally, RMSD value  
213 between  $\alpha$ -carbons of chains was measured to determine if the enzyme was symmetric or  
214 asymmetric.

215 The reference values obtained for IDH1 WT OF and IDH1 WT CF were:

216 Open form: active site cleft widths 21 Å and 19 Å; back cleft widths 11 Å and 12 Å; difference  
217 between the active site clefts was -2 Å; difference between the back clefts was 1 Å; RMSD 0.7  
218 Å.

219 Closed form: active site cleft widths 13 Å; back cleft widths 16 Å; no difference registered  
220 between clefts of the same kind; RMSD 0.3 Å.

221 By comparing the rest of the values in Table 7 with these reference values, we obtained the  
222 following results:

223 - All structures that were either OF or CF present values corresponding to their form.

224 - IDH1 R132H IF have values corresponding to an open form.

225 - All IDH1 WS mutant structures have distances and RMSD values that are closer to the open  
226 form than to the closed form.

227 - IDH2 R140Q WS: Its active site cleft and back cleft have widths that are similar in magnitude to  
228 those of an open form, but the differences between cleft widths of the same kind and RMSD  
229 between chains are similar to those of the closed form.

230 - IDH2 R172K WS: All values correspond to the closed form.



## 231 **Secondary structure of the regulatory segment**

232 IDH1, and by homology IDH2, present a self-regulating mechanism involved in blocking the  
233 conversion of ICT into AKG when the concentration of ICT is low. The segment of the enzyme  
234 participating in this mechanism, the regulatory segment, blocks the access of the substrate to the  
235 catalytic residues, and can only be displaced when enough concentration of the substrate is  
236 reached (Xu et al., 2004; Zhao et al., 2009). In the open form, the regulatory segment forms a  
237 loop in the open cleft, while in the semi-open cleft the first half forms a loop but the second half  
238 adopts an  $\alpha$ -helix structure. In the closed form, the totality of the regulatory segment adopts an  $\alpha$ -  
239 helix structure in both active site clefts. Thus, secondary structure variations in the regulatory  
240 segment assist the enzyme changes from open into closed form and *vice versa* (Figure 1) (Xu et  
241 al., 2004).

242 Mutation IDH1 R132H increases the flexibility of the regulatory segment, hindering its  
243 regulatory function. This increased flexibility also prevents the regulatory segment from being  
244 resolved during X-ray crystallography, as it happens in the structure IDH1 R132H WS (Yang et  
245 al., 2010). As Dang et al exposed in 2008, the absence of the regulatory segment in the binding  
246 site forms a new binding site (Dang et al., 2009). Due to the importance of the secondary  
247 structure of the regulatory segment, we annotated the secondary structure of all its residues in all  
248 the studied structures (Table 3).

249 The following findings are worth considering:

250 - IDH1 R132H IF regulatory segment has some unresolved residues.

251 - IDH2 R140Q WS and IDH2 R172K WS regulatory segments present an  $\alpha$ -helix structure, in  
252 concordance with the observations above that the differences between cleft widths of the same  
253 kind and RMSD values between chains are equivalent to those of the known closed forms.

254 - IDH1 R132H Mod. WS regulatory segment has a loop structure, as expected, given that it was  
255 modelled using the IDH1 R132H WS structure that had most of its regulatory segment  
256 structurally unresolved.

## 257 **Molecular docking binding energies**

258 We docked both substrates ICT and AKG into the active sites of the open forms of the WT  
259 enzyme structures as well as in the WS forms of the mutant enzymes. Then we evaluated their  
260 binding energies (i.e.  $\Delta G$ ) in order to confirm that the binding energy differences between the  
261 substrates ( $\Delta\Delta G$ ) was smaller in the mutant enzymes (IDH1 R132H WS, IDH2 R140Q WS and  
262 IDH2 R172K WS) than in the wild type and IDH1 R100Q WS structures. Thus, explaining the  
263 loss of inhibition by ICT in the former group of mutants. We used the lowest binding energy of  
264 the wild type complexes ( $L\Delta\Delta G$ ) for each cleft as reference, independent of the enzyme studied  
265 (IDH1 or IDH2), to increase the stringency of our calculations (Table 8). The lowest  $\Delta\Delta G$  value,  
266  $L\Delta\Delta G$ , was 1.8 Kcal/mol for the open cleft (from IDH2) and 1.0 Kcal/mol for the semi-open  
267 cleft (from IDH1). As expected, we found that the mutants that appear in tumors had a smaller

268  $\Delta\Delta G$  than the wild types in at least one binding site. The sites (i.e. clefts) with smaller  $\Delta\Delta G$  were  
269 IDH1 R132H WS OC, IDH2 R140Q WS SC and IDH2 R172K WS OC.

## 270 **Binding residues**

271 We identified the residues in the binding sites that bind each substrate (Figure 2) and compared  
272 them using the Jaccard similarity index (Figure 3) to define a binding site similarity (BSS). We  
273 did not attempt to identify a BSS threshold above which sites are similar with statistical  
274 significance. Instead, we defined a threshold of 0.5 to differentiate two broad populations of  
275 comparisons, and just consider those with BSS greater than 0.5 in our discussion of results,  
276 noting that 15.6% of all comparisons made were in this group. We also aimed to identify binding  
277 sites among the mutant enzymes that were similar to the binding sites of known functional  
278 structures. These known functional structures were IDH1 WT CF, IDH1 R132H IF, IDH1 WT  
279 OF and IDH2 WT OF.

280 We found that the BSS in IDH1 WT OF and IDH2 WT OF was higher for the semi-open cleft  
281 (BSS = 0.83) than for the open cleft (BSS = 0.44). We also found that all the mutant binding sites  
282 had a BSS lower than 0.5 with other mutant sites and were therefore considered each as unique.  
283 The following mutant binding sites presented significant similarities with one of the known  
284 functional binding sites:

285 - On both clefts, the binding sites in IDH1 R132H WS for both substrates (Both S.), as well as  
286 ICT and AKG separately, are similar to the binding sites in IDH1 R132H IF.

287 - On both clefts, the binding sites in IDH2 R172K WS for Both S., as well as ICT and AKG  
288 separately, are similar to the binding sites in IDH1 WT CF.

## 289 **Discussion**

### 290 **Contrasts between IDH1 R100Q WS and IDH1 R132H WS binding sites**

291 IDH1 R100Q WS structure was modelled by introducing two mutations (R100Q and H132R) on  
292 both chains of IDH1 R132H WS. Although small structural changes were expected for IDH1  
293 R100Q WS and IDH1 R132H WS binding sites, significant variations were detected in both the  
294 binding energies and the binding residues among these structures. The binding energies obtained  
295 by our molecular dockings indicated that IDH1 R100Q conserves its inhibition by ICT, and thus  
296 it is not expected to produce 2HG. Although to our knowledge there are no functional  
297 characterizations of IDH1 R100Q, there is an IDH1 R100 mutant, IDH1 R100A, that has been  
298 proven to produce 2HG (Ward et al., 2012). However, nucleotide substitutions resulting in  
299 alanine mutations are rarely found in tumours and, in addition, it is not among the possible amino  
300 acid substitutions for IDH1 R100 position attained with just one nucleotide substitution. Instead,  
301 the most common mutation of IDH1 R100 in cancer is IDH1 R100Q (Table 6). This is due to the  
302 presence of a CpG site on IDH1 R100. It is well established that CpG (CG) sites are prone to  
303 mutating into TG sites (Cheng & Blumenthal, 2011). It is interesting to note that the two reported  
304 mutations in IDH1 R100 are CG  $\rightarrow$  TG in the sense (R100X) and antisense (R100Q) strands.

### 305 **The binding sites of the mutant enzymes are different among themselves**

306 One of the expected results of this work was finding a high similarity between the binding sites  
307 of IDH1 R100Q WS and IDH2 R140Q WS and between those of IDH1 R132H WS and IDH2  
308 R172K WS, given that mutations occur in analogous positions. However, our results show large  
309 differences among these binding sites, as showed in Figure 3. But even though binding sites are  
310 very different, all of these mutants, with the exception of IDH1 R100Q, produce 2HG. Even  
311 more, it has been reported that mutating IDH1 R132H analogous positions in isocitrate  
312 dehydrogenase enzymes leads to 2HG production in at least two yeast species (Song et al.,  
313 2014).

314 Differences among mutants are registered not only in the binding sites but also in other structural  
315 features. The regulatory segment is unresolved in IDH1 R132H WS, so presumably it is  
316 behaving as a flexible loop. However, the regulatory segment in IDH2 R140Q WS and IDH2  
317 R172K WS are fully folded into  $\alpha$ -helices, as in the WT closed form enzyme (Table 3). It could  
318 be that the regulatory segment in IDH2 does not need ICT or AKG to fold into an  $\alpha$ -helix and  
319 successfully close the enzyme. This observation is also aligned with other structural features of  
320 IDH2 mutants (differences between cleft widths of the same kind and RMSD values between  
321 chains) which are similar to those of the closed form enzymes (Table 7).

### 322 **Evidence that IDH1 R132H WS and IDH2 R172K WS binding sites are functional**

323 IDH1 R132H WS binding site is similar to IDH1 R132H IF binding site, while IDH2 R172K WS  
324 binding site is similar to IDH1 WT CF binding site. These similarities suggest that, upon  
325 substrate binding, mutant enzymes behave as WT enzyme with bound substrate in intermediate  
326 form and closed form, respectively. The intermediate and closed form correspond to different  
327 stages of the enzyme while going from an inactive form into its active form. Therefore, substrate  
328 binding on mutant binding sites could be driving the enzymes into their active form.

### 329 **The importance of the regulatory segment**

330 Mutant binding sites are deeply influenced by the regulatory segment behavior, which either  
331 exposes a previously inaccessible site (IDH1 R100Q WS and IDH1 R132H WS), is part of the  
332 binding site or helps the change in enzyme form (IDH2 R140Q WS and IDH2 R172K WS).  
333 However, a regulatory segment like the one in IDH1 has not been previously characterized in  
334 enzymes that were not IDH1 homologs. The regulatory segment is in the  $\beta$ -sandwich domain of  
335 the enzyme, while the active site is in the Rossmann domain (Xu et al., 2004). This means that the  
336 regulatory segment is not necessarily exclusive of enzymes with the Rossmann domain or  
337 enzymes with isocitrate dehydrogenase activity.

### 338 **Conclusion**

339 Our methodology, i.e. characterization of the inhibition loss through molecular docking, proved  
340 to be a successful approach to our system. Binding energies reported by molecular docking were  
341 consistent with the known inhibition/loss of inhibition phenotypes from the different enzymes

342 studied. Additionally, the Jaccard similarity between binding sites allowed structural similarities  
343 to be assessed across a set of structures using a defined function, in contrast to traditional  
344 methods that require a case by case interpretation. Furthermore, this methodology can be used to  
345 explore mutant binding sites from other enzyme families.

346 Binding sites characterization is one of the most important tasks in protein engineering, since one  
347 of the most common goals in protein design is substituting the substrate of an enzyme for another  
348 substrate that undergoes a certain chemical reaction of interest.

349 One of the most recurring questions that researchers seek to answer when studying the IDH1 and  
350 IDH2 mutants related to cancer is: Why do the positions IDH1 R132, IDH2 R140 and IDH2  
351 R172 are related to cancer, but IDH1 R100 is not? In this work we propose an explanation, based  
352 on a structural characterization, of why the binding site of IDH1 R100Q does not lose its  
353 inhibition and therefore it is not related to cancer.

354 In recent years, several drugs (including some drugs already in clinical research phases) were  
355 developed aiming to block cancer-related mutants of IDH1 and IDH2 (Deng et al., 2015; Wu et  
356 al., 2015; Zheng et al., 2013). One of the most remarkable aspects of the design of these drugs is  
357 the possibility, currently unfulfilled, of targeting several mutations in both enzymes based on the  
358 fact that these mutations occur in analogous positions. Our results show that this promiscuous  
359 activity is unlikely to be achieved, given that the binding site and the protein structure of  
360 different mutant enzymes present significant differences.

## 361 **References**

- 362 Berman, H. M., Bhat, T. N., Bourne, P. E., Feng, Z., Gilliland, G., Weissig, H. & Westbrook, J.  
363 (2000). The Protein Data Bank and the challenge of structural genomics. *Nature Structural &*  
364 *Molecular Biology*, 7(11s), 957.
- 365 Cairns, R. A., Iqbal, J., Lemonnier, F., Kucuk, C., de Leval, L., Jais, J. P., Parrens, M., Martin,  
366 A., Xerri, L., Brousset, P., Chan, L. C., Chan, W. C., Gaulard, P., & Mak, T. W. (2012). IDH2  
367 mutations are frequent in angioimmunoblastic T-cell lymphoma. *Blood*, 119(8), 1901-1903.
- 368 Ceccarelli, C., Grodsky, N. B., Ariyaratne, N., Colman, R. F. & Bahnson, B. J. (2002). Crystal  
369 Structure of Porcine Mitochondrial NADP<sup>+</sup>-dependent Isocitrate Dehydrogenase Complexed  
370 with Mn<sup>2+</sup> and Isocitrate. Insights into the enzyme mechanism. *Journal of Biological Chemistry*,  
371 277(45), 43454-43462.
- 372 Cheng, X., & Blumenthal, R. M. (2011). Introduction—Epiphanies in epigenetics. *Progress in*  
373 *molecular biology and translational science*, 101, 1.
- 374 Dang, L., White, D. W., Gross, S., Bennett, B. D., Bittinger, M. A., Driggers, E. M., Fantin, V.  
375 R., Jang, H. G. Jin, S., Keenan, M. C., Marks, K. M., Prins, R. M., Ward, P. S., Yen, K. E., Liau,  
376 L. M., Rabinowitz, J. D., Cantley, L. C., Thompson, C. B., Vander Heiden, M. G. & Su, S. M.  
377 (2009). Cancer-associated IDH1 mutations produce 2-hydroxyglutarate. *Nature*, 462(7274), 739-  
378 744.

- 379 Deng, G., Shen, J., Yin, M., McManus, J., Mathieu, M., Gee, P., He, T., Shi, C., Bedel, O.,  
380 McLean, L. R., Le-Strat, F., Zhang, Y., Marquette, J., Gao, Q., Zhang, B., Rak, A., Hoffmann,  
381 D., Rooney, E., Vassort, A., Englaro, W., Li, Y., Patel, V., Adrian, F., Gross, S., Wiederschain,  
382 D., Cheng, H. & Licht, S. (2015). Selective inhibition of mutant isocitrate dehydrogenase 1  
383 (IDH1) via disruption of a metal binding network by an allosteric small molecule. *Journal of*  
384 *Biological Chemistry*, 290(2), 762-774.
- 385 Filipp, F. V., Scott, D. A., Ronai, Z. E. A., Osterman, A. L. & Smith, J. W. (2012). Reverse TCA  
386 cycle flux through isocitrate dehydrogenases 1 and 2 is required for lipogenesis in hypoxic  
387 melanoma cells. *Pigment cell & melanoma research*, 25(3), 375-383.
- 388 Forbes, S. A., Beare, D., Gunasekaran, P., Leung, K., Bindal, N., Boutselakis, H., Ding, M.,  
389 Bamford, S., Cole, C., Ward, S., Kok, C. Y., Jia, M., De, T., Teague, J. W., Stratton, M. R.,  
390 McDermott, U. & Campbell, P. J. (2015). COSMIC: exploring the world's knowledge of somatic  
391 mutations in human cancer. *Nucleic acids research* 43.D1, D805- D811.
- 392 Holliday, G. L., Andreini, C., Fischer, J. D., Rahman, S. A., Almonacid, D. E., Williams, S. T. &  
393 Pearson, W. R. (2012). MACiE: exploring the diversity of biochemical reactions. *Nucleic acids*  
394 *research* 40.D1, D776-D789.
- 395 Jaccard, P. (1912). The distribution of the flora in the alpine zone. *New phytologist*, 11(2), 37-  
396 50.
- 397 Jacobson, M. P., Pincus, D. L., Rapp, C. S., Day, T. J. F., Honig, B., Shaw, D. E. & Friesner, R.  
398 A. (2004). A Hierarchical Approach to All-Atom Protein Loop Prediction. *Proteins: Structure,*  
399 *Function and Bioinformatics*, 55, 351-367.
- 400 Kim, S., Thiessen, P. A., Bolton, E. E., Chen, J., Fu, G., Gindulyte, A., Han, L., He, J., He, S.,  
401 Shoemaker, B. A., Wang, J., Yu, B., Zhang, J. & Bryant, S. H. (2016). PubChem Substance and  
402 Compound databases. *Nucleic Acids Research*, 44(D1), D1202-13.
- 403 Losman, J. A. & Kaelin, W. G. (2013). What a difference a hydroxyl makes: mutant IDH<sub>1</sub>(R)-2-  
404 hydroxyglutarate, and cancer. *Genes & development*, 27(8), 836-852.
- 405 Marcucci, G., Maharry, K., Wu, Y. Z., Radmacher, M. D., Mrozek, K., Margeson, D., Holland,  
406 K.B., Whitman, S. P., Becker, H., Schwind, S., Metzeler, K. H., Powell, B. L., Carter, T. H.,  
407 Kolitz, J. E., Wetzler, M., Carroll, A. J., Baer, M. R., Caligiuri, M. A., Larson, R. A. &  
408 Bloomfield, C. D. (2010). IDH1 and IDH2 gene mutations identify novel molecular subsets  
409 within de novo cytogenetically normal acute myeloid leukemia: A cancer and leukemia group B  
410 study. *J Clin Oncol* 28: 2348–2355.
- 411 Morris, G. M., Huey, R., Lindstrom, W., Sanner, M. F., Belew, R. K., Goodsell, D. S. & Olson,  
412 A. J. (2009). Autodock4 and AutoDockTools4: automated docking with selective receptor  
413 flexibility. *J. Computational Chemistry*, 16: 2785-91.

- 414 NCBI Resource Coordinators. (2016). Database resources of the National Center for  
415 Biotechnology Information. *Nucleic Acids Research*, 44(Database issue), D7–D19.
- 416 Lv, Q., Xing, S., Li, Z., Li, J., Gong, P., Xu, X., Chang, L., Jin, X., Gao, F., Li, W., Zhang, G.,  
417 Yang, J. & Zhang, X. (2012). Altered expression levels of IDH2 are involved in the development  
418 of colon cancer. *Experimental and therapeutic medicine*, 4(5), 801-806.
- 419 Lessel, U. & Schomburg, D. (1994). Similarities between protein 3-D structures. *Protein*  
420 *Engineering, Design and Selection*, 7(10), 1175-1187.
- 421 Pei, J., Kim, B. H. & Grishin, N. V. (2008). PROMALS3D: a tool for multiple sequence and  
422 structure alignment. *Nucleic Acids Res.* 36(7), 2295-2300.
- 423 Pietrak, B., Zhao, H., Qi, H., Quinn, C., Gao, E., Boyer, J.G., Concha, N., Brown, K.,  
424 Duraiswami, C., Wooster, R., Sweitzer, S. & Shwartz, B. "A tale of two subunits: how the  
425 neomorphic R132H IDH1 mutation enhances production of  $\alpha$ HG." *Biochemistry* 50.21 (2011):  
426 4804-4812.
- 427 Rendina, A. R., Pietrak, B., Smallwood, A., Zhao, H., Qi, H., Quinn, C., Adams, N. D., Concha,  
428 N., Duraiswami, C., Thrall, S. H., Sweitzer, S. & Schwartz, B. (2013). Mutant IDH1 enhances  
429 the production of 2-hydroxyglutarate due to its kinetic mechanism. *Biochemistry*, 52(26), 4563-  
430 4577.
- 431 Šali, A. & Blundell, T. L. (1993). Comparative protein modelling by satisfaction of spatial  
432 restraints. *J. Mol. Biol.* 234, 779-815.
- 433 Schrödinger. (2015). Schrödinger Release 2015-1: Maestro, version 10.1, Schrödinger, LLC,  
434 New York, NY, 2015.
- 435 Song, P., Wei, H., Cao, Z., Wang, P. & Zhu, G. (2014). Single arginine mutation in two yeast  
436 isocitrate dehydrogenases: biochemical characterization and functional implication. *PloS one*, 9  
437 (12), e115025.
- 438 Ward, P. S., Cross, J. R., Lu, C., Weigert, O., Abel-Wahab, O., Levine, R. L., Weinstock, D. M.,  
439 Sharp, K. A. & Thompson, C. B. (2012). Identification of additional IDH mutations associated  
440 with oncometabolite R (-)-2-hydroxyglutarate production. *Oncogene*, 31(19), 2491-2498.
- 441 Warren, G. L., Andrews, C. W., Capelli, A. M., Clarke, B., LaLonde, J., Lambert, M. H.,  
442 Lindvall, M., Nevins, N., Semus, S. F., Senger, S., Tedesco, G., Wall, I. D., Woolven, J. M.,  
443 Peishoff, C. E. & Head, M. S. (2006). A critical assessment of docking programs and scoring  
444 functions. *Journal of medicinal chemistry*, 49(20), 5912-5931.
- 445 Wise, D. R., Ward, P. S., Shay, J. E., Cross, J. R., Gruber, J. J., Sachdeva, U. M., Platt, J. M.,  
446 DeMatteo, R. G., Simon, M. C. & Thompson, C. B. (2011). Hypoxia promotes isocitrate  
447 dehydrogenase-dependent carboxylation of  $\alpha$ -ketoglutarate to citrate to support cell growth and  
448 viability. *Proceedings of the National Academy of Sciences*, 108(49), 19611-19616.

- 449 Wu, F., Jiang, H., Zheng, B., Kogiso, M., Yao, Y., Zhou, C., Li, X. N. & Song, Y. (2015).  
450 Inhibition of cancer-associated mutant isocitrate dehydrogenases by 2-thiohydantoin compounds.  
451 *Journal of medicinal chemistry*, 58(17), 6899-6908.
- 452 Xie, X., Baird, D., Bowen, K., Capka, V., Chen, J., Chenail, G., Cho, Y., Dooley, J., Farsidjani,  
453 A., Fortin, P., Kohls, D., Kulathila, R., Lin, F., McKay, D., Rodrigues, L., Sage, D., Touré, B. B.,  
454 van der Plas, S., Wright, K., Xu, M., Yin, H., Levell, J. & Pagliarini, R. A. (2017). Allosteric  
455 mutant IDH1 inhibitors reveal mechanisms for IDH1 mutant and isoform selectivity. *Structure*,  
456 25(3), 506-513.
- 457 Xu, X., Zhao, J., Xu, Z., Peng, B., Huang, Q., Arnold, E. & Ding, J. (2004). Structures of human  
458 cytosolic NADP-dependent isocitrate dehydrogenase reveal a novel self-regulatory mechanism  
459 of activity. *Journal of Biological Chemistry*, 279(32), 33946-33957.
- 460 Yan, H., Parsons, D. W., Jin, G., McLendon, R., Rasheed, B. A., Yuan, W., Kos, I., Batinic-  
461 Haberle, I., Jones, S., Riggins, G. J., Friedman, H., Friedman, A., Reardon, D., Herndon, J.,  
462 Kinzler, K. W., Velculescu, V. E., Vogelstein, B., & Bigner, D. D. (2009). IDH1 and IDH2  
463 mutations in gliomas. *New England Journal of Medicine*, 360(8), 765-773.
- 464 Yang, B., Zhong, C., Peng, Y., Lai, Z. & Ding, J. (2010). Molecular mechanisms of “off-on  
465 switch” of activities of human IDH1 by tumor-associated mutation R132H. *Cell research*,  
466 20(11), 1188-1200.
- 467 Zhao, S., Lin, Y., Xu, W., Jiang, W., Zha, Z., Wang, P., Yu, W., Li, Z., Gong, L., Peng, Y., Ding,  
468 J., Lei, Q., Guan, K. & Xiong, Y. (2009). Glioma-Derived Mutations in IDH1 Dominantly  
469 Inhibit IDH1 Catalytic Activity and Induce HIF-1 $\alpha$ . *Science*, 324(5924), 261-265.
- 470 Zheng, B., Yao, Y., Liu, Z., Deng, L., Anglin, J. L., Jiang, H., Prasad, B. V. & Song, Y. (2013).  
471 Crystallographic investigation and selective inhibition of mutant isocitrate dehydrogenase. *ACS*  
472 *medicinal chemistry letters*, 4(6), 542-546.

# Figure 1

Relation between the width of the active site and back clefts and the form of the IDH enzymes.

The blue and red lines represent the subunits of the dimer. The triangle represents the substrate. In the open form, the active site cleft is open and the back cleft is closed, and *vice versa* in the closed form. The width of the clefts is correlated to the secondary structure adopted by the regulatory segment. This figure is based on Figure 6 of the article of Xu et al., 2004.



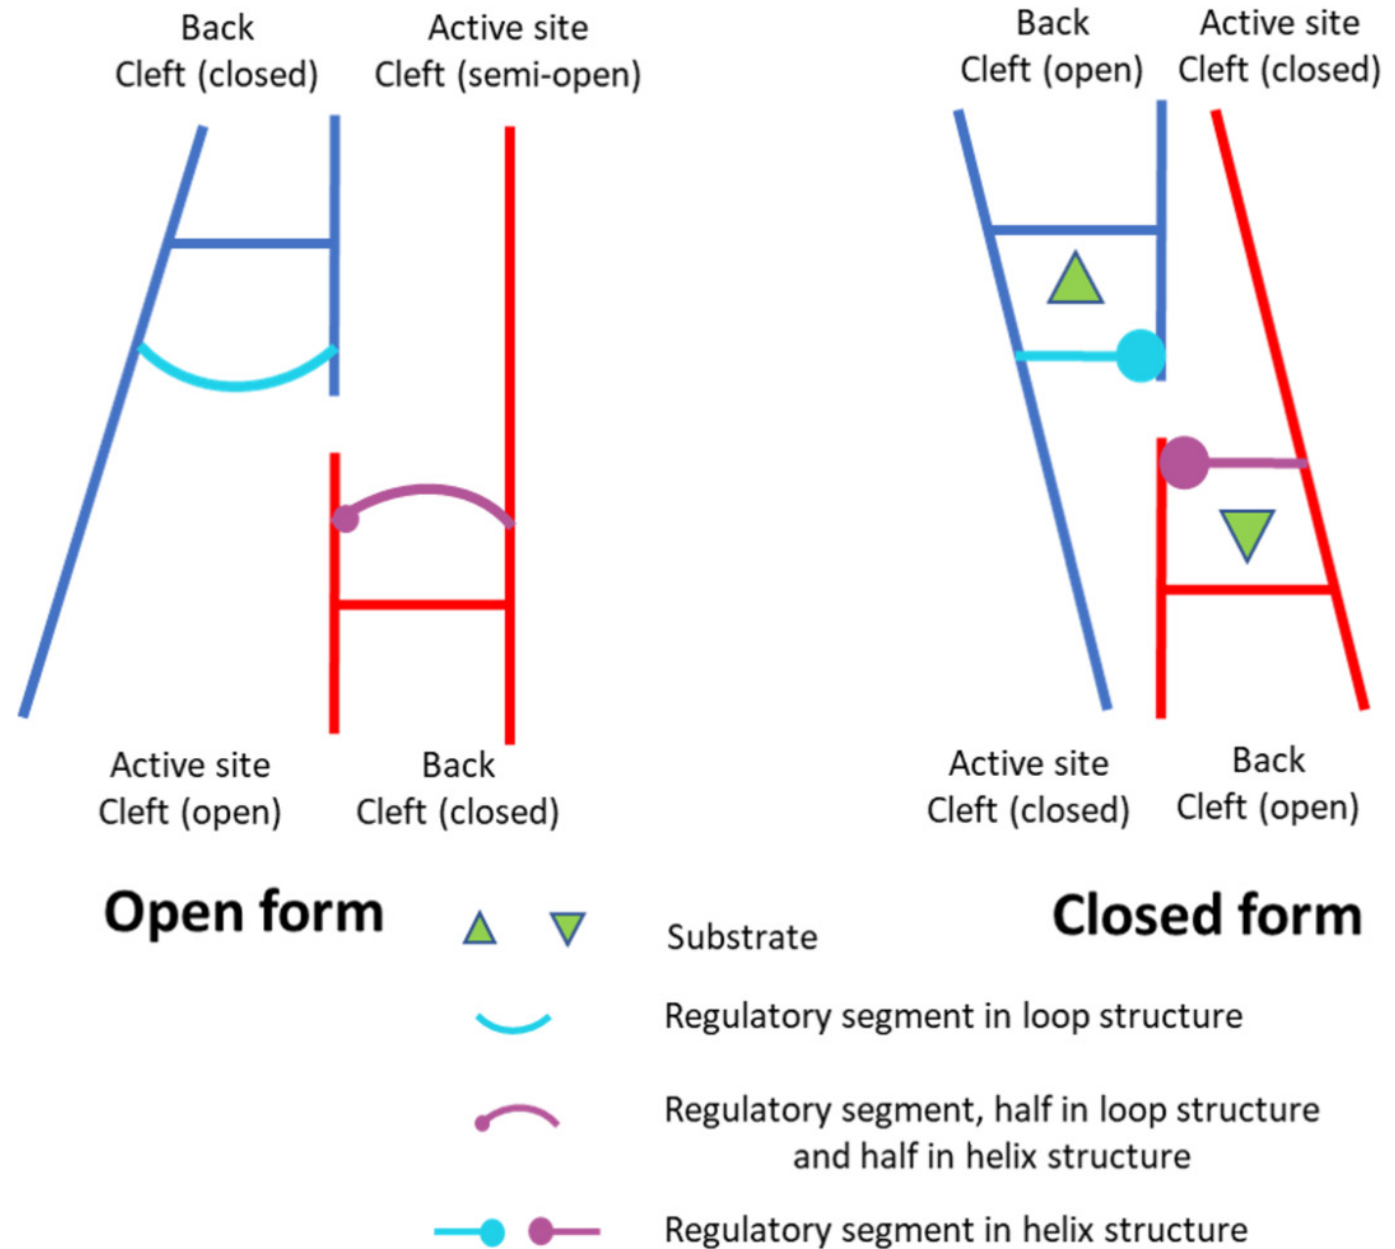

## Figure 2

Residues binding ICT and AKG in the binding sites of IDH1 and IDH2 WT and mutant enzymes.

The first row of the table indicates the structure, the second the cleft and the ligands. Orange cells indicate the mutant binding sites (i.e. clefts) with smaller  $\Delta\Delta G$  compared to the WT  $\Delta\Delta G$ , as reported in Table 8. The position of all the residues involved in substrate binding are indicated in the columns. Unresolved residues are indicated by an “-”. The three central columns show the position equivalences between IDH1 and IDH2, and serve as reference for the rest of the table. IDH1 residues are on the left columns, and IDH2 residues are on the right columns. Numbers in red in the IDH1 and IDH2 central columns indicate residues not involved in substrate binding in IDH1 or IDH2, respectively. The central column indicates structural and functional characteristics of the residues. The color of the central column indicates to which domain the residues belong. Red: Rossmann domain, green:  $\alpha/\beta$ -sandwich domain, yellow: clasp domain. Symbols in the middle column stand for: “!” catalytic residue, “+” regulatory segment, “\*” binding residue in the closed form, and “#” binding residue in the intermediate form.

| IDH1 WT OF     |     | IDH1 R100Q WS |     | IDH1 R132H WS |     | IDH1 | Residues Char. | IDH2 | IDH2 WT OF |     | IDH2 R140Q WS |     | IDH2 R172K WS |     |     |
|----------------|-----|---------------|-----|---------------|-----|------|----------------|------|------------|-----|---------------|-----|---------------|-----|-----|
| OC             | SC  | OC            | SC  | OC            | SC  |      |                |      | OC         | SC  | OC            | SC  | OC            | SC  | OC  |
| ICT            | AKG | ICT           | AKG | ICT           | AKG | ICT  | AKG            | ICT  | AKG        | ICT | AKG           | ICT | AKG           | ICT | AKG |
| Same chain     |     |               |     |               |     |      |                |      |            |     |               |     |               |     |     |
|                |     |               |     | 75            | 75  | 75   | 75             | 115  |            |     |               |     |               |     |     |
|                |     |               |     | 77            | 77  | 77   | 77             | *#   | 117        |     |               |     | 117           | 117 | 117 |
|                |     | 94            |     | 94            | 94  | 94   | 94             | *#   | 134        |     |               |     | 134           | 134 | 134 |
|                |     |               |     |               |     |      |                |      | 135        |     |               |     |               | 135 | 135 |
|                |     | 96            | 96  |               |     | 96   | 96             | 96   | *#         | 136 |               |     |               | 136 | 136 |
|                |     |               |     |               |     |      |                | 97   | #          | 137 |               |     |               |     |     |
|                |     | 100           | 100 | 100           | 100 | 100  | 100            | 100  | *#         | 140 | 140           |     |               | 140 | 140 |
|                |     |               |     | 106           | 106 |      |                | 106  |            | 146 | 146           | 146 |               |     |     |
|                |     | 107           | 107 | 107           | 107 |      |                | 107  |            | 147 | 147           | 147 |               | 147 |     |
| 109            | 109 | 109           | 109 | 109           | 109 |      | 109            | 109  | *#         | 149 | 149           | 149 |               | 149 | 149 |
|                |     |               |     |               |     |      |                | 130  |            | 170 |               |     |               | 170 |     |
|                |     |               |     |               |     |      |                | 131  |            | 171 | 171           | 171 |               |     |     |
| 132            | 132 | 132           | 132 |               | 132 | 132  |                | 132  | *          | 172 | 172           | 172 |               | 172 | 172 |
|                |     | 133           | 133 |               | 133 |      |                | 133  |            | 173 | 173           | 173 | 173           | 173 | 173 |
| 134            | 134 | 134           | 134 | 134           | 134 | 134  |                | 134  |            | 174 | 174           | 174 |               | 174 | 174 |
|                |     | 135           | 135 | -             | -   | -    | -              | 135  |            | 175 | 175           | 175 |               | 175 | 175 |
|                |     | 136           | 136 | -             | -   | -    | -              | 136  |            | 176 | 176           | 176 |               | 176 | 176 |
|                |     |               |     |               |     |      |                | 139  | *!         | 179 |               |     |               |     |     |
|                |     |               |     |               |     |      |                | 269  |            | 308 |               |     |               |     |     |
|                |     |               |     |               |     |      |                | 270  |            | 309 |               | 308 |               |     |     |
|                |     | 271           | 271 |               |     |      |                | 271  | +          | 310 |               | 309 |               |     |     |
|                |     | 272           | 272 | -             | -   | -    | -              | 272  | +          | 311 |               | 310 |               | 311 | 311 |
|                |     | 273           | 273 | -             | -   | -    | -              | 273  | +          | 312 |               | 311 |               | 312 | 312 |
|                |     |               |     |               |     |      |                | 274  | +          | 313 |               |     |               | 313 |     |
| 275            | 275 |               |     |               |     |      |                | 275  | *+         | 314 | 314           | 314 |               | 314 |     |
| 276            | 276 |               |     |               |     |      |                | 276  | +          | 315 | 315           |     |               |     |     |
| 277            | 277 |               |     |               |     |      |                | 277  | +          | 316 | 316           | 316 |               |     |     |
| 278            | 278 |               |     |               |     |      |                | 278  | +          | 317 | 317           | 317 |               | 317 |     |
|                |     |               |     |               |     |      |                | 279  | +          | 318 |               |     | 318           |     |     |
| 280            |     |               |     |               |     |      |                | 280  | +          | 319 |               |     |               |     |     |
| 281            |     |               |     |               |     |      |                | 281  | +          | 320 |               |     |               |     |     |
|                |     |               |     |               |     |      |                | 288  |            | 327 |               | 327 | 327           | 327 |     |
|                |     | 306           | 306 |               |     | 306  | 306            | 306  |            | 345 |               |     |               |     |     |
|                |     | 308           | 308 |               |     | 308  | 308            | 308  | *          | 347 |               |     | 347           | 347 | 347 |
|                |     |               |     |               |     |      |                | 309  |            | 348 |               |     | 348           | 348 | 348 |
|                |     |               |     |               |     |      |                | 310  |            | 349 |               |     | 349           | 349 | 349 |
|                |     |               |     | NAP           | NAP | NAP  | NAP            | NAP  | *#         | NAP |               |     | NAP           | NAP | NAP |
| Opposite chain |     |               |     |               |     |      |                |      |            |     |               |     |               |     |     |
| 212            | 212 | 212           | 212 |               |     |      |                | 212  | *!         | 251 |               | 251 | 251           | 251 | 251 |
|                |     |               |     |               |     |      |                | 214  | *          | 253 |               |     |               | 253 | 253 |
| 215            | 215 | 215           | 215 |               |     |      |                | 215  | *          | 254 |               | 254 |               | 254 | 254 |
|                |     |               |     |               |     |      |                | 250  |            | 289 |               |     |               | 289 | 289 |
|                |     |               |     |               |     |      |                | 252  | *!         | 291 |               |     |               | 291 | 291 |

## Figure 3

Similarities among binding sites of IDH1 and IDH2 WT and mutant enzymes.

The similarity values were calculated using the Jaccard coefficient based on the residues involved in substrate binding. Orange cells indicate binding sites (i.e. clefts) with smaller  $\Delta\Delta G$  compared to the WT  $\Delta\Delta G$ , as reported in the Table 8. Green cells indicate Jaccard coefficient values over 0.50, an arbitrary threshold to highlight high similarity among sites. From top to bottom, the rows of tables describe similarities of the open cleft and the semi-open cleft in the same structure, only the open cleft and only the semi-open cleft. From left to right, the first tables describe the similarities between the binding site of both substrates in the same structure. The second tables describe the similarities between the binding sites of two structures when considering both substrates. The third and fourth tables are equivalent to the second table but considering only ICT or AKG, respectively.

| Between Clefts |  | Both Substrates |               |               |            |               |               | ICT        |               |               |            |               |               | AKG        |               |               |            |               |               |
|----------------|--|-----------------|---------------|---------------|------------|---------------|---------------|------------|---------------|---------------|------------|---------------|---------------|------------|---------------|---------------|------------|---------------|---------------|
|                |  | IDH1 WT OF      | IDH1 R100Q WS | IDH1 R132H WS | IDH2 WT OF | IDH2 R140Q WS | IDH2 R172K WS | IDH1 WT OF | IDH1 R100Q WS | IDH1 R132H WS | IDH2 WT OF | IDH2 R140Q WS | IDH2 R172K WS | IDH1 WT OF | IDH1 R100Q WS | IDH1 R132H WS | IDH2 WT OF | IDH2 R140Q WS | IDH2 R172K WS |
|                |  | 0.24            | 0.36          | 0.64          | 0.14       | 0.46          | 1.00          | 0.24       | 0.36          | 0.40          | 0.11       | 0.08          | 1.00          | 0.20       | 0.44          | 0.70          | 0.12       | 0.86          | 0.93          |

  

| Open Cleft | Between Substrates |               | Both S.    |               |               |            |               |               |            |               | ICT        |               |               |            |               |               |            |               | AKG        |               |               |            |               |               |            |               |
|------------|--------------------|---------------|------------|---------------|---------------|------------|---------------|---------------|------------|---------------|------------|---------------|---------------|------------|---------------|---------------|------------|---------------|------------|---------------|---------------|------------|---------------|---------------|------------|---------------|
|            | IDH1 WT OF         |               | IDH1 WT OF | IDH1 R100Q WS | IDH1 R132H WS | IDH2 WT OF | IDH2 R140Q WS | IDH2 R172K WS | IDH1 WT CF | IDH1 R132H IF | IDH1 WT OF | IDH1 R100Q WS | IDH1 R132H WS | IDH2 WT OF | IDH2 R140Q WS | IDH2 R172K WS | IDH1 WT CF | IDH1 R132H IF | IDH1 WT OF | IDH1 R100Q WS | IDH1 R132H WS | IDH2 WT OF | IDH2 R140Q WS | IDH2 R172K WS | IDH1 WT CF | IDH1 R132H IF |
|            |                    | 0.73          | 1.00       | 0.12          | 0.06          | 0.44       | 0.06          | 0.23          | 0.25       | 0.06          | 1.00       | 0.12          | 0.06          | 0.44       | 0.06          | 0.24          | 0.25       | 0.06          | 1.00       | 0.07          | 0.07          | 0.38       | 0.07          | 0.21          | 0.29       | 0.07          |
|            |                    | 0.88          | 0.12       | 1.00          | 0.45          | 0.25       | 0.15          | 0.26          | 0.29       | 0.36          | 0.07       | 1.00          | 0.40          | 0.25       | 0.17          | 0.28          | 0.29       | 0.36          | 0.07       | 1.00          | 0.36          | 0.21       | 0.17          | 0.22          | 0.24       | 0.27          |
|            |                    | 0.75          | 0.06       | 0.45          | 1.00          | 0.11       | 0.25          | 0.33          | 0.47       | 0.67          | 0.07       | 0.36          | 1.00          | 0.06       | 0.25          | 0.35          | 0.47       | 0.67          | 0.07       | 0.36          | 1.00          | 0.06       | 0.25          | 0.35          | 0.47       | 0.67          |
|            |                    | 0.83          | 0.44       | 0.25          | 0.11          | 1.00       | 0.06          | 0.22          | 0.18       | 0.12          | 0.38       | 0.21          | 0.06          | 1.00       | 0.06          | 0.19          | 0.14       | 0.06          | 0.38       | 0.21          | 0.06          | 1.00       | 0.06          | 0.19          | 0.14       | 0.06          |
|            |                    | 0.86          | 0.06       | 0.15          | 0.25          | 0.06       | 1.00          | 0.10          | 0.17       | 0.17          | 0.07       | 0.17          | 0.25          | 0.06       | 1.00          | 0.10          | 0.17       | 0.17          | 0.07       | 0.17          | 0.25          | 0.06       | 1.00          | 0.10          | 0.17       | 0.17          |
|            | 0.88               | 0.23          | 0.26       | 0.33          | 0.22          | 0.10       | 1.00          | 0.58          | 0.35       | 0.21          | 0.22       | 0.35          | 0.19          | 0.10       | 1.00          | 0.61          | 0.38       | 0.21          | 0.22       | 0.35          | 0.19          | 0.10       | 1.00          | 0.61          | 0.38       |               |
|            |                    | IDH1 WT CF    | 0.25       | 0.29          | 0.47          | 0.18       | 0.17          | 0.58          | 1.00       | 0.40          | 0.29       | 0.24          | 0.43          | 0.18       | 0.18          | 0.61          | 1.00       | 0.40          | 0.29       | 0.24          | 0.47          | 0.14       | 0.17          | 0.61          | 1.00       | 0.40          |
|            |                    | IDH1 R132H IF | 0.06       | 0.36          | 0.67          | 0.12       | 0.17          | 0.35          | 0.40       | 1.00          | 0.06       | 0.36          | 0.63          | 0.12       | 0.18          | 0.38          | 0.40       | 1.00          | 0.07       | 0.27          | 0.67          | 0.06       | 0.17          | 0.38          | 0.40       | 1.00          |

  

| Semi-open Cleft | Between Substrates |               | Both S.    |               |               |            |               |               |            |               | ICT        |               |               |            |               |               |            |               | AKG        |               |               |            |               |               |            |               |
|-----------------|--------------------|---------------|------------|---------------|---------------|------------|---------------|---------------|------------|---------------|------------|---------------|---------------|------------|---------------|---------------|------------|---------------|------------|---------------|---------------|------------|---------------|---------------|------------|---------------|
|                 | IDH1 WT OF         |               | IDH1 WT OF | IDH1 R100Q WS | IDH1 R132H WS | IDH2 WT OF | IDH2 R140Q WS | IDH2 R172K WS | IDH1 WT CF | IDH1 R132H IF | IDH1 WT OF | IDH1 R100Q WS | IDH1 R132H WS | IDH2 WT OF | IDH2 R140Q WS | IDH2 R172K WS | IDH1 WT CF | IDH1 R132H IF | IDH1 WT OF | IDH1 R100Q WS | IDH1 R132H WS | IDH2 WT OF | IDH2 R140Q WS | IDH2 R172K WS | IDH1 WT CF | IDH1 R132H IF |
|                 |                    | 1.00          | 1.00       | 0.21          | 0.00          | 0.83       | 0.05          | 0.30          | 0.14       | 0.00          | 1.00       | 0.21          | 0.00          | 0.80       | 0.06          | 0.32          | 0.14       | 0.00          | 1.00       | 0.14          | 0.00          | 0.58       | 0.00          | 0.33          | 0.14       | 0.00          |
|                 |                    | 0.86          | 0.21       | 1.00          | 0.13          | 0.19       | 0.19          | 0.28          | 0.17       | 0.17          | 0.14       | 1.00          | 0.07          | 0.15       | 0.27          | 0.29          | 0.17       | 0.17          | 0.14       | 1.00          | 0.15          | 0.07       | 0.09          | 0.25          | 0.18       | 0.18          |
|                 |                    | 0.70          | 0.00       | 0.13          | 1.00          | 0.00       | 0.10          | 0.37          | 0.33       | 0.70          | 0.00       | 0.07          | 1.00          | 0.00       | 0.00          | 0.28          | 0.29       | 0.67          | 0.00       | 0.15          | 1.00          | 0.00       | 0.15          | 0.44          | 0.35       | 0.60          |
|                 |                    | 0.42          | 0.83       | 0.19          | 0.00          | 1.00       | 0.04          | 0.27          | 0.13       | 0.00          | 0.80       | 0.15          | 0.00          | 1.00       | 0.00          | 0.28          | 0.10       | 0.00          | 0.58       | 0.07          | 0.00          | 1.00       | 0.00          | 0.21          | 0.10       | 0.00          |
|                 |                    | 0.08          | 0.05       | 0.19          | 0.10          | 0.04       | 1.00          | 0.12          | 0.24       | 0.12          | 0.06       | 0.27          | 0.00          | 0.00       | 1.00          | 0.10          | 0.17       | 0.08          | 0.00       | 0.09          | 0.15          | 0.00       | 1.00          | 0.11          | 0.18       | 0.18          |
|                 | 0.81               | 0.30          | 0.28       | 0.37          | 0.27          | 0.12       | 1.00          | 0.58          | 0.35       | 0.32          | 0.29       | 0.28          | 0.28          | 0.10       | 1.00          | 0.61          | 0.38       | 0.33          | 0.25       | 0.44          | 0.21          | 0.11       | 1.00          | 0.56          | 0.40       |               |
|                 |                    | IDH1 WT CF    | 0.14       | 0.17          | 0.33          | 0.13       | 0.24          | 0.58          | 1.00       | 0.40          | 0.14       | 0.17          | 0.29          | 0.10       | 0.17          | 0.61          | 1.00       | 0.40          | 0.14       | 0.18          | 0.35          | 0.10       | 0.18          | 0.56          | 1.00       | 0.40          |
|                 |                    | IDH1 R132H IF | 0.00       | 0.17          | 0.70          | 0.00       | 0.12          | 0.35          | 0.40       | 1.00          | 0.00       | 0.17          | 0.67          | 0.00       | 0.08          | 0.38          | 0.40       | 1.00          | 0.00       | 0.18          | 0.60          | 0.00       | 0.18          | 0.40          | 0.40       | 1.00          |

## **Table 1** (on next page)

Human IDH1, human IDH2, porcine IDH2 and *Escherichia coli*'s IDH reference sequences and SNPs.

The only SNP registered for the IDH enzymes is located in position IDH1 R100.

| Gene               | mRNA sequence | Protein sequence | SNP mRNA sequence | Reference SNP cluster |
|--------------------|---------------|------------------|-------------------|-----------------------|
| Human IDH1         | NM_005896.3   | NP_005887.2      | NM_001282386.1    | rs777129475           |
| Human IDH2         | NM_002168.3   | NP_002159.2      | -                 | -                     |
| Porcine IDH2       | -             | NP_001157479.1   | -                 | -                     |
| <i>E. coli</i> IDH | -             | NP_415654.1      | -                 | -                     |

1

## **Table 2**(on next page)

Table 2: IDH1 and IDH2 WT and mutant enzymes studied in this work.

The table includes the source of the structures (obtained from PDB, from homology modeling or from modeled mutations), ligands present in the structures and literature references.



| Structure          | Source                     | Ligands     | Reference               |
|--------------------|----------------------------|-------------|-------------------------|
| IDH1 WT CF         | PDB 1T0L                   | NADP+ + ICT | Xu et al., 2004         |
| IDH1 R132H CF      | PDB 4KZO                   | NADP+ + AKG | Rendina et al., 2013    |
| Porcine IDH2 WT CF | PDB 1LWD                   | ICT         | Ceccarelli et al., 2002 |
| IDH1 R132H IF      | PDB 3MAP                   | NADP+ + ICT | Yang et al., 2010       |
| IDH1 WT OF         | PDB 1T09                   | NADP+       | Xu et al., 2004         |
| IDH2 WT OF         | Modeled from IDH1 WT OF    | NADP+       | -                       |
| IDH1 R100Q WS      | Mutated from IDH1 R132H WS | NADP+       | -                       |
| IDH1 R132H WS      | PDB 3MAR                   | NADP+       | Yang et al., 2010       |
| IDH1 R132H Mod. WS | Modeled from IDH1 R132H WS | NADP+       | -                       |
| IDH2 R140Q WS      | PDB 5SVO                   | NADP+       | Xie et al., 2017        |
| IDH2 R172K WS      | PDB 5SVN                   | NADPH       | Xie et al., 2017        |

1

## **Table 3**(on next page)

Table 3. Secondary structure of the regulatory segment of IDH1 and IDH2 WT and mutant enzymes.

The table shows the secondary structure for each residue of the regulatory segment. Green:  $\alpha$ -helix, yellow:  $\beta$ -sheet, blue: loop, and red: unresolved residue.

| Structure     | Chain | Position |     |     |     |     |     |     |     |     |     |     |     |     |     |     |     |
|---------------|-------|----------|-----|-----|-----|-----|-----|-----|-----|-----|-----|-----|-----|-----|-----|-----|-----|
| IDH1          |       | 271      | 272 | 273 | 274 | 275 | 276 | 277 | 278 | 279 | 280 | 281 | 282 | 283 | 284 | 285 | 286 |
| IDH2          |       | 310      | 311 | 312 | 313 | 314 | 315 | 316 | 317 | 318 | 319 | 320 | 321 | 322 | 323 | 324 | 325 |
| Porcine IDH2  |       | 279      | 280 | 281 | 282 | 283 | 284 | 285 | 286 | 287 | 288 | 289 | 290 | 291 | 292 | 293 | 294 |
| IDH1          | A     |          |     |     |     |     |     |     |     |     |     |     |     |     |     |     |     |
| WT CF         | B     |          |     |     |     |     |     |     |     |     |     |     |     |     |     |     |     |
| IDH1          | A     |          |     |     |     |     |     |     |     |     |     |     |     |     |     |     |     |
| R132H CF      | B     |          |     |     |     |     |     |     |     |     |     |     |     |     |     |     |     |
| Porcine IDH2  | A     |          |     |     |     |     |     |     |     |     |     |     |     |     |     |     |     |
| WT CF         | B     |          |     |     |     |     |     |     |     |     |     |     |     |     |     |     |     |
| IDH1          | A     |          |     |     |     |     |     |     |     |     |     |     |     |     |     |     |     |
| R132H IF      | B     |          |     |     |     |     |     |     |     |     |     |     |     |     |     |     |     |
| IDH1          | A     |          |     |     |     |     |     |     |     |     |     |     |     |     |     |     |     |
| WT OF         | B     |          |     |     |     |     |     |     |     |     |     |     |     |     |     |     |     |
| IDH2          | A     |          |     |     |     |     |     |     |     |     |     |     |     |     |     |     |     |
| WT OF         | B     |          |     |     |     |     |     |     |     |     |     |     |     |     |     |     |     |
| IDH1          | A     |          |     |     |     |     |     |     |     |     |     |     |     |     |     |     |     |
| R100Q WS      | B     |          |     |     |     |     |     |     |     |     |     |     |     |     |     |     |     |
| IDH1          | A     |          |     |     |     |     |     |     |     |     |     |     |     |     |     |     |     |
| R132H WS      | B     |          |     |     |     |     |     |     |     |     |     |     |     |     |     |     |     |
| IDH1          | A     |          |     |     |     |     |     |     |     |     |     |     |     |     |     |     |     |
| R132H Mod. WS | B     |          |     |     |     |     |     |     |     |     |     |     |     |     |     |     |     |
| IDH2          | A     |          |     |     |     |     |     |     |     |     |     |     |     |     |     |     |     |
| R140Q WS      | B     |          |     |     |     |     |     |     |     |     |     |     |     |     |     |     |     |
| IDH2          | A     |          |     |     |     |     |     |     |     |     |     |     |     |     |     |     |     |
| R172K WS      | B     |          |     |     |     |     |     |     |     |     |     |     |     |     |     |     |     |

1

## **Table 4**(on next page)

Table 4: Residues flanking the active site cleft and the back cleft of IDH1 and IDH2.

Note that the back cleft is flanked by residues of the same protein chain (S. Ch.), whereas the active site cleft is flanked by a residue of the S. Ch. and a residue of the opposite protein chain (O. Ch.).

| Enzyme       | Active site cleft residues |            | Back cleft residues |            |
|--------------|----------------------------|------------|---------------------|------------|
|              | S. Ch.                     | O. Ch.     | S. Ch.              | S. Ch.     |
| Human IDH1   | 76 S. Ch.                  | 250 O. Ch. | 199 S. Ch.          | 342 S. Ch. |
| Human IDH2   | 116 S. Ch.                 | 289 O. Ch. | 238 S. Ch.          | 381 S. Ch. |
| Porcine IDH2 | 85 S. Ch.                  | 258 O. Ch. | 207 S. Ch.          | 350 S. Ch. |

1

## **Table 5** (on next page)

Table 5: Human IDH1 and IDH2 closed form binding residues.

The binding residues are the residues within 4Å from the substrates. IDH1 binding residues were obtained from IDH1 WT CF and IDH2 residues were mapped by sequence alignment with IDH1.

| Enzyme     | Same chain |     |     |     |     |     |     |     |     | Opposite chain |     |     |     |
|------------|------------|-----|-----|-----|-----|-----|-----|-----|-----|----------------|-----|-----|-----|
|            | Human IDH1 | 77  | 94  | 96  | 100 | 109 | 132 | 139 | 275 | 308            | 212 | 214 | 215 |
| Human IDH2 | 117        | 134 | 136 | 140 | 149 | 172 | 179 | 314 | 347 | 251            | 253 | 254 | 291 |

1

## Table 6 (on next page)

Table 6. Substitutions of human IDH1 and IDH2 in cancer.

Columns represent triplet nucleotides (in order) and rows registered substitutions on those nucleotides. The amino acidic product and the abundance of each nucleotide substitution is informed. IDH1 R100 substitutions are informed for the two known alleles.



| Subs. | IDH1 R100 Triplet |                 |                 | IDH2 R140 Triplet |            |          | IDH1 R132 Triplet |             |          | IDH2 R172 Triplet |            |           |
|-------|-------------------|-----------------|-----------------|-------------------|------------|----------|-------------------|-------------|----------|-------------------|------------|-----------|
|       | C, A              | G               | A               | C                 | G          | G        | C                 | G           | T        | A                 | G          | G         |
| A     | WT                | Gln 8,<br>Lys 0 | WT              | Arg<br>0          | Gln<br>753 | Arg<br>0 | Ser<br>165        | His<br>4371 | Arg<br>0 | WT                | Lys<br>300 | Arg<br>1  |
| G     | Gly<br>0          | WT              | Arg 0,<br>Arg 0 | Gly<br>4          | WT         | WT       | Gly<br>196        | WT          | Arg<br>0 | Gly<br>13         | WT         | WT        |
| T     | STOP<br>2         | Leu 0,<br>Ile 0 | Arg 0,<br>Ser 0 | Trp<br>14         | Leu<br>12  | Arg<br>0 | Cys<br>769        | Leu<br>103  | WT       | Trp<br>20         | Met<br>31  | Ser<br>29 |
| C     | WT                | Pro 0,<br>Thr 0 | Arg 0,<br>Ser 0 | WT                | Pro<br>0   | Arg<br>0 | WT                | Pro<br>0    | Arg<br>0 | Arg<br>1          | Thr<br>3   | Ser<br>14 |

1

## Table 7 (on next page)

Table 7. Cleft widths and RMSDs between chains of IDH1 and IDH2 WT and mutant enzymes [Å].

Blue cells indicate the width of the entrance of the active site cleft and the back cleft for each chain of the dimeric structures. Yellow cells indicate the difference among between the widths of the same clefts in opposite chains. Green cells report the RMSD values between both chains of the dimer structure. Darker colors highlight values of larger magnitude.

| Structure          | Chain A           |            | Chain B           |            | $\Delta$          |            | RMSD |
|--------------------|-------------------|------------|-------------------|------------|-------------------|------------|------|
|                    | Active site cleft | Back cleft | Active site cleft | Back cleft | Active site cleft | Back cleft |      |
| IDH1 WT CF         | 12.8              | 16.2       | 12.6              | 16.2       | -0.2              | 0.0        | 0.3  |
| IDH1 R132H CF      | 12.4              | 16.0       | 12.5              | 15.8       | 0.1               | -0.2       | 0.3  |
| Porcine IDH2 CF    | 13.7              | 15.3       | 13.7              | 15.4       | 0.0               | 0.1        | 0.2  |
| IDH1 R132H IF      | 19.6              | 10.7       | 17.5              | 11.0       | -2.1              | 0.3        | 0.6  |
| IDH1 WT OF         | 21.2              | 10.9       | 18.8              | 11.7       | -2.4              | 0.8        | 0.7  |
| IDH2 WT OF         | 21.4              | 10.8       | 19.2              | 11.7       | -2.2              | 0.9        | 0.8  |
| IDH1 R100Q WS      | 20.5              | 11.6       | 18.3              | 11.3       | -2.2              | -0.3       | 0.6  |
| IDH1 R132H WS      | 20.7              | 11.6       | 18.6              | 11.3       | -2.1              | -0.3       | 0.6  |
| IDH1 R132H Mod. WS | 20.7              | 11.6       | 18.6              | 11.3       | -2.1              | -0.3       | 0.6  |
| IDH2 R140Q WS      | 21.6              | 12.3       | 21.5              | 12.1       | -0.1              | -0.2       | 0.4  |
| IDH2 R172K WS      | 12.5              | 16.1       | 12.4              | 16.0       | -0.1              | -0.1       | 0.2  |

1

## Table 8 (on next page)

Table 8. Binding energies of substrates [Kcal/mol] in IDH1 and IDH2 WT and mutant enzymes.

The first row indicates the binding site (OC = open cleft; SC = semi-open cleft). The second row contains column headers for binding energy of ICT, AKG, the difference between ICT and AKG ( $\Delta\Delta$ ), and the difference between the  $\Delta\Delta G$  and the  $L\Delta\Delta$  of the binding site ( $\Delta\Delta\Delta$ ). For  $\Delta\Delta\Delta$ : green:  $>0$ ; red:  $<0$ ; white:  $\approx 0$ . Darker colors highlight values of larger magnitude.

| Structure     | OC    |      |                |                      | SC   |      |                |                      |
|---------------|-------|------|----------------|----------------------|------|------|----------------|----------------------|
|               | ICT   | AKG  | $\Delta\Delta$ | $\Delta\Delta\Delta$ | ICT  | AKG  | $\Delta\Delta$ | $\Delta\Delta\Delta$ |
| IDH1 WT OF    | -8.0  | -5.9 | 2.1            | -                    | -4.4 | -3.4 | 1.0            | -                    |
| IDH1 R100Q WS | -4.2  | -2.9 | 1.3            | -0.5                 | -4.2 | -3.4 | 0.8            | -0.2                 |
| IDH1 R132H WS | -5.3  | -5.0 | 0.3            | -1.5                 | -4.7 | -3.0 | 1.7            | 0.7                  |
| IDH2 WT OF    | -10.7 | -8.9 | 1.8            | -                    | -6.7 | -3.9 | 2.8            | -                    |
| IDH2 R140Q WS | -6.7  | -5.6 | 1.1            | -0.7                 | -3.9 | -6.3 | -2.4           | -3.4                 |
| IDH2 R172K WS | -7.5  | -7.3 | 0.2            | -1.6                 | -8.3 | -7.4 | 0.9            | -0.1                 |

1
